# Supplementary material for: Temporal dynamics and turnover of rabbit hemorrhagic disease virus 2 (RHDV2/GI.2) in wild lagomorphs from northeastern Spain
Source: Research Square preprint supplement (doi:10.21203/rs.3.rs-8310298/v1), 2025-12-15
Supplement: Supplementary file 1 [file f17148213b8a6b2ceca9737c.docx]

**Temporal dynamics and turnover of rabbit hemorrhagic disease virus 2 (RHDV2/GI.2) in wild lagomorphs from northeastern Spain**

Josep Estruch1*, Tereza Almeida2,3, Lorena Pereira2,3, Emmanuel Serrano1, Carlos Rouco4, Santiago Lavín1, Joana Abrantes2,3,5, Roser Velarde1* and Ana M. Lopes6,7

1 Wildlife Ecology & Health group (WE&H) and Servei d’Ecopatologia de Fauna Salvatge (SEFaS), Universitat Autònoma de Barcelona, Barcelona, Spain.

2CIBIO, Centro de Investigação em Biodiversidade e Recursos Genéticos, InBIO Laboratório Associado, Campus de Vairão, Universidade do Porto, Vairão, Portugal.

3BIOPOLIS Program in Genomics, Biodiversity and Land Planning, CIBIO, Campus de Vairão, Vairão, Portugal.

4Departamento de Biología Vegetal y Ecología, Universidad de Sevilla, Sevilla, Spain

5Departamento de Biologia, Faculdade de Ciências, Universidade do Porto, Porto, Portugal.

6UMIB-Unit for Multidisciplinary Research in Biomedicine, ICBAS-School of Medicine and Biomedical Sciences, University of Porto, Porto, Portugal.

7ITR, Laboratory for Integrative and Translational Research in Population Health, Porto, Portugal.

*Corresponding authors: [josep.estruch@uab.cat](mailto:josep.estruch@uab.cat) (JE), [roser.velarde@uab.cat](mailto:roser.velarde@uab.cat) (RV)

**Supplementary Table 1.** PCR primers and amplification conditions.

| Primer name | Sequence (5’ – 3’) | Annealing temperature (ºC) | Extension time (s) | Product length (bp) |
| --- | --- | --- | --- | --- |
| RHDV0078F  RHDV1530R | CTTCCTGGACCTCAGGGACAAG  CATGACGAAGCAGAGACCAC | 52 | 50 | 1452 |
| RHDV0078F  RHDVb460RC | CTTCCTGGACCTCAGGGACAAG  CCGAGCTCAATAAACAAGTC | 53 | 50 | 382 |
| RHDV0087F  RHDVb460RC | CAAGACCCCTCCCTGTTGT  CCGAGCTCAATAAACAAGTC | 53 | 6 | 373 |
| RHDV1432F  RHDV2515R | AGGTGCACCCTGCCATCATACAA  TTCCACTCACAGACCACGCTCAT | 54 | 16 | 1083 |
| RHDV2356F  RHDV3592R | CAACATCTTTGGCGCATGGT  AAGATTGACGTGCTGGCGTA | 56 | 19 | 1236 |
| RHDV4584F  RHDVb5400RC | AGCAAACGGAGCTCACCAA  GGTGTTGTGGCCACTACTAG | 52 | 13 | 816 |
| RHDV5302F  RHDV6282R | GTACCTGACGACGAATTTGTGAATG  CTGGAGCAATTTGGGAGATG | 56 | 15 | 980 |
| RHDV6186F  RHDV6748R | CATTGACCACGACAGAGGTAAC  CTGAGGCCGGTTCAACTAACG | 67 | 8 | 562 |
| RHDV6661F  RHDV7437R | GCCGCTCCTATTGGCAAGAAC  TTGGGTTTATAGTTTAAAGTAAGCTAT | 53 | 10 | 776 |

**Supplementary Table 2.** Representative sequences of the different genotype lineages and recombinant types of rabbit hemorrhagic disease virus 2 (RHDV2/GI.2) used in the alignment. Recombinant lagoviruses follow a standardized nomenclature denoted as [RdRp genotype]P-[capsid genotype] [26].

| Sequence ID | Genotype/variant | Recombinant type | Country | Year | GenBank Accession | Reference |
| --- | --- | --- | --- | --- | --- | --- |
| Hokkaido/2002/JPN | GI.1a | - | Japan | 2002 | AB300693 | Oka et al. 2009 |
| Eisenhuttenstadt_  Germany | GI.1b | - | Germany | 1989 | EF558578 | Forrester et al. 2008 |
| Saudi_Arabia | GI.1c | - | Saudi Arabia | 2006 | DQ189078 | Forrester et al. 2006 |
| BS89_Italy | GI.1d | - | Italy | 1989 | X87607 | Rossi 1995 (Unpublished) |
| N11_Spain | GI.2 | GI.3P-GI.2 | Spain | 2011 | KM878681 | Dalton et al. 2015 |
| SOS148 | GI.2 | GI.4 (p16)- GI.3P-GI.2 | Portugal | 2015 | MG763942 | Abrantes et al. 2020 |
| SOS089_Portugal | GI.2 | GI.1bP-GI.2 | Portugal | 2014 | MG763936 | Silvério et al. 2018 |
| SOS164_Portugal | GI.2 | GI.4(p16)-GI.1bP-GI.2 | Portugal | 2015 | MG763948 | Silvério et al. 2018 |
| CBAnd1_Spain | GI.2 | GI.4P-GI.2 | Spain | 2012 | KP090976 | Lopes et al. 2015 |
| 06-11_France | GI.3 | - | France | 2006 | MN737115 | Abrantes et al. 2020 |
| RCV-A1_Australia | GI.4 | - | Australia | 2007 | EU871528 | Strive et al. 2009 |

**Bibliography:**

Abrantes, J., Lopes, A. M., Lemaitre, E., Ahola, H., Banihashem, F., Droillard, C., Marchandeau, S., Esteves, P. J., Neimanis, A., & Gall-Reculé, G. Le. (2020). Retrospective analysis shows that most rhdv gi.1 strains circulating since the late 1990s in france and sweden were recombinant gi.3p–gi.1d strains. *Genes*, *11*(8), 1–13. https://doi.org/10.3390/genes11080910

Dalton, K. P., Abrantes, J., Lopes, A. M., Nicieza, I., Álvarez, L., Esteves, P. J., & Parra, F. (2015). Complete genome sequence of two rabbit hemorrhagic disease virus variant b isolates detected on the Iberian Peninsula. *Archives of Virology*, *160*(3), 877–881. https://doi.org/10.1007/s00705-014-2329-3

Forrester, N. L., Abubakr, M. I., Abu Elzein, E. M. E., Al-Afaleq, A. I., Housawi, F. M. T., Moss, S. R., Turner, S. L., & Gould, E. A. (2006). Phylogenetic analysis of Rabbit haemorrhagic disease virus strains from the Arabian Peninsula: Did RHDV emerge simultaneously in Europe and Asia? *Virology*, *344*(2), 277–282. https://doi.org/10.1016/j.virol.2005.10.006

Forrester, N. L., Moss, S. R., Turner, S. L., Schirrmeier, H., & Gould, E. A. (2008). Recombination in rabbit haemorrhagic disease virus: Possible impact on evolution and epidemiology. *Virology*, *376*(2), 390–396. https://doi.org/10.1016/j.virol.2008.03.023

Lopes, A. M., Dalton, K. P., Magalhães, M. J., Parra, F., Esteves, P. J., Holmes, E. C., & Abrantes, J. (2015). Full genomic analysis of new variant rabbit hemorrhagic disease virus revealed multiple recombination events. *Journal of General Virology*, *96*, 1309–1319. https://doi.org/10.1099/VIR.0.000070

Oka, T., Yokoyama, M., Katayama, K., Tsunemitsu, H., Yamamoto, M., Miyashita, K., Ogawa, S., Motomura, K., Mori, H., Nakamura, H., Wakita, T., Takeda, N., & Sato, H. (2009). Structural and biological constraints on diversity of regions immediately upstream of cleavage sites in calicivirus precursor proteins. *Virology*, *394*(1), 119–129. https://doi.org/10.1016/j.virol.2009.08.018

Silvério, D., Lopes, A. M., Melo-Ferreira, J., Magalhães, M. J., Monterroso, P., Serronha, A., Maio, E., Alves, P. C., Esteves, P. J., & Abrantes, J. (2018). Insights into the evolution of the new variant rabbit haemorrhagic disease virus (GI.2) and the identification of novel recombinant strains. *Transboundary and Emerging Diseases*, *65*(4), 983–992. https://doi.org/10.1111/tbed.12830

Strive, T., Wright, J. D., & Robinson, A. J. (2009). Identification and partial characterisation of a new lagovirus in Australian wild rabbits. *Virology*, *384*(1), 97–105. https://doi.org/10.1016/j.virol.2008.11.004
